# Supplementary material for: Paclitaxel and Caffeine–Taurine, New Colchicine Alternatives for Chromosomes Doubling in Maize Haploid Breeding
Source: MDPI journal article supplement (doi:10.3390/ijms241914659), 2023-09-28
Supplement: s1 [file s1]

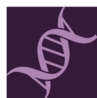

## Supplementary

# Paclitaxel and Caffeine-Taurine, New Colchicine Alternatives for Chromosomes Doubling in Maize Haploid Breeding

Saeed Arshad<sup>1</sup>, Mengli Wei<sup>1</sup>, Qurban Ali<sup>2</sup>, Ghulam Mustafa<sup>2</sup>, Zhengqiang Ma<sup>1</sup> and Yuanxin Yan<sup>1,3\*</sup>

<sup>1</sup>State Key Laboratory of Crop Genetics and Germplasm Enhancement, Nanjing Agricultural University, Nanjing 210095, China; [maliksaeedawan@hotmail.com](mailto:maliksaeedawan@hotmail.com) (S.A); [www.1980666@126.com](http://www.1980666@126.com) (ZM)

<sup>2</sup>Key Laboratory of Integrated Management of Crop Diseases and Pests, Ministry of Education, Department of Plant Pathology, College of Plant Protection, Nanjing Agricultural University, Nanjing 210095, China; [rat-qurban@hotmail.com](mailto:rat-qurban@hotmail.com) (Q.A); [2018201104@njau.edu.cn](mailto:2018201104@njau.edu.cn) (G.M.).

<sup>3</sup>Jiangsu Collaborative Innovation Center for Modern Crop Production, Nanjing 210095, China

\*Correspondence: [yuanxin.yan@njau.edu.cn](mailto:yuanxin.yan@njau.edu.cn) (Y.Y).

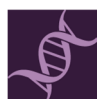

**Table S1. Comparative DH Seed Quantity Produced by Paclitaxel, Caffeine-Taurine and Colchicine by Seed Soaking Method**

|     | Paclitaxel Seed Soaking Method |                             |                              |                              |                             |                  | Colchicine Seed Soaking Method |                              |                              |                             |                            |                  | Caffeine-Taurine Seed Soaking Method |                             |                              |                             |                            |                            |
|-----|--------------------------------|-----------------------------|------------------------------|------------------------------|-----------------------------|------------------|--------------------------------|------------------------------|------------------------------|-----------------------------|----------------------------|------------------|--------------------------------------|-----------------------------|------------------------------|-----------------------------|----------------------------|----------------------------|
|     | Treatment                      | RR (%)                      | OSR%                         | 1-5<br>Seed/Ear              | 6-25<br>Seeds/Ear           | >25<br>Seeds/Ear | Treatment                      | RR (%)                       | OSR%                         | 1-5<br>Seed/Ear             | 6-25<br>Seeds/Ear          | >25<br>Seeds/Ear |                                      | RR (%)                      | OSR%                         | 1-5<br>Seed/Ear             | 6-25<br>Seeds/Ear          | >25<br>Seeds/Ear           |
| T1  | PTX 100 $\mu$ M, 8h            | 0.0 $\pm$ 0.0 <sup>z</sup>  | 0.0 $\pm$ 0.0 <sup>b</sup>   | 0.0 $\pm$ 0.0 <sup>s</sup>   | 0.0 $\pm$ 0.0 <sup>e</sup>  | 0.0 $\pm$ 0.0    | Colchicine 0.5mM, 8h           | 2.3 $\pm$ 0.7 <sup>cde</sup> | 1.4 $\pm$ 0.5 <sup>cde</sup> | 2.3 $\pm$ 0.3 <sup>bc</sup> | 0.0 $\pm$ 0.0 <sup>c</sup> | 0.0 $\pm$ 0.0    | Caffeine 1g/L, 8h                    | 3.9 $\pm$ 1.0 <sup>b</sup>  | 2.5 $\pm$ 0.5 <sup>b</sup>   | 3.9 $\pm$ 1.0 <sup>a</sup>  | 0.0 $\pm$ 0.0 <sup>d</sup> | 0.0 $\pm$ 0.0              |
| T2  | PTX 200 $\mu$ M, 8h            | 0.7 $\pm$ 0.3 <sup>g</sup>  | 0.5 $\pm$ 0.5 <sup>gh</sup>  | 0.7 $\pm$ 0.2 <sup>g</sup>   | 0.0 $\pm$ 0.0 <sup>e</sup>  | 0.0 $\pm$ 0.0    | Colchicine 1.0mM, 8h           | 3.0 $\pm$ 1.0 <sup>cd</sup>  | 1.9 $\pm$ 0.6 <sup>c</sup>   | 3.0 $\pm$ 1.0 <sup>b</sup>  | 0.0 $\pm$ 0.0 <sup>c</sup> | 0.0 $\pm$ 0.0    | Caffeine 2g/L, 8h                    | 1.6 $\pm$ 0.6 <sup>cd</sup> | 1.0 $\pm$ 1.0 <sup>cd</sup>  | 1.5 $\pm$ 1.0 <sup>b</sup>  | 0.0 $\pm$ 0.0 <sup>d</sup> | 0.0 $\pm$ 0.0              |
| T3  | PTX 400, 8h                    | 0.0 $\pm$ 0.0 <sup>s</sup>  | 0.0 $\pm$ 0.0 <sup>b</sup>   | 0.0 $\pm$ 0.0 <sup>s</sup>   | 0.0 $\pm$ 0.0 <sup>e</sup>  | 0.0 $\pm$ 0.0    | Colchicine 1.5mM, 8h           | 1.4 $\pm$ 0.4 <sup>def</sup> | 1.0 $\pm$ 0.5 <sup>cde</sup> | 1.4 $\pm$ 0.1 <sup>cd</sup> | 0.0 $\pm$ 0.0 <sup>c</sup> | 0.0 $\pm$ 0.0    | Caffeine 4g/L, 8h                    | 0.7 $\pm$ 0.3 <sup>de</sup> | 0.5 $\pm$ 0.5 <sup>de</sup>  | 0.7 $\pm$ 0.3 <sup>bc</sup> | 0.0 $\pm$ 0.0 <sup>d</sup> | 0.0 $\pm$ 0.0              |
| T4  | PTX 800 $\mu$ M, 8h            | 1.5 $\pm$ 0.6 <sup>ef</sup> | 1.0 $\pm$ 0.5 <sup>efg</sup> | 1.5 $\pm$ 0.3 <sup>ef</sup>  | 0.0 $\pm$ 0.0 <sup>e</sup>  | 0.0 $\pm$ 0.0    | Colchicine 2.0mM, 8h           | 7.0 $\pm$ 2.0 <sup>a</sup>   | 3.9 $\pm$ 1.0 <sup>a</sup>   | 5.5 $\pm$ 1.5 <sup>a</sup>  | 1.6 $\pm$ 0.4 <sup>a</sup> | 0.0 $\pm$ 0.0    | Caffeine 6g/L, 8h                    | 2.4 $\pm$ 0.6 <sup>c</sup>  | 1.4 $\pm$ 0.4 <sup>c</sup>   | 1.6 $\pm$ 0.4 <sup>b</sup>  | 0.8 $\pm$ 0.2 <sup>c</sup> | 0.0 $\pm$ 0.0              |
| T5  | PTX 100 $\mu$ M, 16h           | 5.3 $\pm$ 1.2 <sup>b</sup>  | 3.3 $\pm$ 0.7 <sup>b</sup>   | 3.8 $\pm$ 0.4 <sup>b</sup>   | 1.5 $\pm$ 0.4 <sup>bc</sup> | 0.0 $\pm$ 0.0    | Colchicine 0.5mM, 16h          | 5.1 $\pm$ 1.9 <sup>b</sup>   | 2.9 $\pm$ 1.0 <sup>b</sup>   | 4.5 $\pm$ 1.0 <sup>a</sup>  | 0.7 $\pm$ 0.2 <sup>b</sup> | 0.0 $\pm$ 0.0    | Caffeine 1g/L, 16h                   | 6.0 $\pm$ 2.0 <sup>a</sup>  | 3.9 $\pm$ 0.6 <sup>a</sup>   | 3.8 $\pm$ 0.9 <sup>a</sup>  | 1.5 $\pm$ 0.5 <sup>b</sup> | 0.7 $\pm$ 0.3 <sup>a</sup> |
| T6  | PTX 200 $\mu$ M, 16h           | 2.4 $\pm$ 0.4 <sup>de</sup> | 1.5 $\pm$ 0.5 <sup>def</sup> | 2.4 $\pm$ 0.7 <sup>de</sup>  | 0.0 $\pm$ 0.0 <sup>e</sup>  | 0.0 $\pm$ 0.0    | Colchicine 1.0mM, 16h          | 3.5 $\pm$ 1.0 <sup>c</sup>   | 1.6 $\pm$ 0.4 <sup>cd</sup>  | 2.5 $\pm$ 0.7 <sup>bc</sup> | 0.8 $\pm$ 0.3 <sup>b</sup> | 0.0 $\pm$ 0.0    | Caffeine 2g/L, 16h                   | 6.5 $\pm$ 1.5 <sup>a</sup>  | 4.3 $\pm$ 1.0 <sup>a</sup>   | 3.7 $\pm$ 1.3 <sup>a</sup>  | 3.0 $\pm$ 1.0 <sup>a</sup> | 0.0 $\pm$ 0.0              |
| T7  | PTX 400, 16h                   | 0.8 $\pm$ 0.8 <sup>g</sup>  | 0.5 $\pm$ 0.5 <sup>gh</sup>  | 0.8 $\pm$ 0.4 <sup>g</sup>   | 0.0 $\pm$ 0.0 <sup>e</sup>  | 0.0 $\pm$ 0.0    | Colchicine 1.5mM, 16h          | 1.6 $\pm$ 0.4 <sup>def</sup> | 1.0 $\pm$ 0.5 <sup>cde</sup> | 1.6 $\pm$ 0.6 <sup>cd</sup> | 0.0 $\pm$ 0.0 <sup>c</sup> | 0.0 $\pm$ 0.0    | Caffeine 4g/L, 16h                   | 0.0 $\pm$ 0.0 <sup>e</sup>  | 0.0 $\pm$ 0.0 <sup>e</sup>   | 0.0 $\pm$ 0.0 <sup>c</sup>  | 0.0 $\pm$ 0.0 <sup>d</sup> | 0.0 $\pm$ 0.0              |
| T8  | PTX 800 $\mu$ M, 16h           | 3.5 $\pm$ 1.0 <sup>cd</sup> | 1.9 $\pm$ 0.5 <sup>cde</sup> | 2.6 $\pm$ 0.9 <sup>cd</sup>  | 0.9 $\pm$ 0.9 <sup>d</sup>  | 0.0 $\pm$ 0.0    | Colchicine 2.0mM, 16h          | 0.0 $\pm$ 0.0 <sup>f</sup>   | 0.0 $\pm$ 0.0 <sup>f</sup>   | 0.0 $\pm$ 0.0 <sup>e</sup>  | 0.0 $\pm$ 0.0 <sup>c</sup> | 0.0 $\pm$ 0.0    | Caffeine 6g/L, 16h                   | 0.0 $\pm$ 0.0 <sup>e</sup>  | 0.0 $\pm$ 0.0 <sup>e</sup>   | 0.0 $\pm$ 0.0 <sup>c</sup>  | 0.0 $\pm$ 0.0 <sup>d</sup> | 0.0 $\pm$ 0.0              |
| T9  | PTX 100 $\mu$ M, 24h           | 7.8 $\pm$ 1.3 <sup>a</sup>  | 4.8 $\pm$ 0.8 <sup>a</sup>   | 5.5 $\pm$ 1.5 <sup>a</sup>   | 2.3 $\pm$ 0.5 <sup>a</sup>  | 0.0 $\pm$ 0.0    | Colchicine 0.5mM, 24h          | 1.6 $\pm$ 0.5 <sup>def</sup> | 0.9 $\pm$ 0.3 <sup>def</sup> | 1.6 $\pm$ 0.4 <sup>cd</sup> | 0.0 $\pm$ 0.0 <sup>c</sup> | 0.0 $\pm$ 0.0    | Caffeine 1g/L, 24h                   | 0.0 $\pm$ 0.0 <sup>e</sup>  | 0.0 $\pm$ 0.0 <sup>e</sup>   | 0.0 $\pm$ 0.0 <sup>c</sup>  | 0.0 $\pm$ 0.0 <sup>d</sup> | 0.0 $\pm$ 0.0              |
| T10 | PTX 200 $\mu$ M, 24h           | 3.3 $\pm$ 0.7 <sup>cd</sup> | 2.0 $\pm$ 0.1 <sup>cd</sup>  | 3.3 $\pm$ 0.3 <sup>bcd</sup> | 0.0 $\pm$ 0.0 <sup>e</sup>  | 0.0 $\pm$ 0.0    | Colchicine 1.0mM, 24h          | 1.5 $\pm$ 0.5 <sup>def</sup> | 1.0 $\pm$ 0.1 <sup>cde</sup> | 1.5 $\pm$ 0.5 <sup>cd</sup> | 0.0 $\pm$ 0.0 <sup>c</sup> | 0.0 $\pm$ 0.0    | Caffeine 2g/L, 24h                   | 0.8 $\pm$ 0.8 <sup>de</sup> | 0.5 $\pm$ 0.5 <sup>de</sup>  | 1.0 $\pm$ 0.2 <sup>bc</sup> | 0.0 $\pm$ 0.0 <sup>d</sup> | 0.0 $\pm$ 0.0              |
| T11 | PTX 400, 24h                   | 5.6 $\pm$ 1.4 <sup>b</sup>  | 3.0 $\pm$ 1.0 <sup>b</sup>   | 3.7 $\pm$ 0.3 <sup>b</sup>   | 1.9 $\pm$ 0.1 <sup>ab</sup> | 0.0 $\pm$ 0.0    | Colchicine 1.5mM, 24h          | 2.3 $\pm$ 1.3 <sup>cde</sup> | 1.4 $\pm$ 0.5 <sup>cde</sup> | 1.6 $\pm$ 0.4 <sup>cd</sup> | 0.8 $\pm$ 0.5 <sup>b</sup> | 0.0 $\pm$ 0.0    | Caffeine 4g/L, 24h                   | 0.0 $\pm$ 0.0 <sup>e</sup>  | 0.0 $\pm$ 0.0 <sup>e</sup>   | 0.0 $\pm$ 0.0 <sup>c</sup>  | 0.0 $\pm$ 0.0 <sup>d</sup> | 0.0 $\pm$ 0.0              |
| T12 | PTX 800 $\mu$ M, 24h           | 4.3 $\pm$ 1.0 <sup>bc</sup> | 2.4 $\pm$ 1.0 <sup>bc</sup>  | 3.5 $\pm$ 0.5 <sup>bc</sup>  | 1.0 $\pm$ 0.5 <sup>cd</sup> | 0.0 $\pm$ 0.0    | Colchicine 2.0mM, 24h          | 0.0 $\pm$ 0.0 <sup>f</sup>   | 0.0 $\pm$ 0.0 <sup>f</sup>   | 0.0 $\pm$ 0.0 <sup>e</sup>  | 0.0 $\pm$ 0.0 <sup>c</sup> | 0.0 $\pm$ 0.0    | Caffeine 6g/L, 24h                   | 0.0 $\pm$ 0.0 <sup>e</sup>  | 0.0 $\pm$ 0.0 <sup>e</sup>   | 0.0 $\pm$ 0.0 <sup>c</sup>  | 0.0 $\pm$ 0.0 <sup>d</sup> | 0.0 $\pm$ 0.0              |
| T13 | Control                        | 0.7 $\pm$ 0.3 <sup>g</sup>  | 0.6 $\pm$ 0.4 <sup>gh</sup>  | 0.7 $\pm$ 0.3 <sup>g</sup>   | 0.0 $\pm$ 0.0 <sup>e</sup>  | 0.0 $\pm$ 0.0    | Control                        | 0.7 $\pm$ 0.3 <sup>ef</sup>  | 0.6 $\pm$ 0.4 <sup>ef</sup>  | 0.7 $\pm$ 0.3 <sup>de</sup> | 0.0 $\pm$ 0.0 <sup>c</sup> | 0.0 $\pm$ 0.0    | Control                              | 0.7 $\pm$ 0.3 <sup>de</sup> | 0.6 $\pm$ 0.4 <sup>cde</sup> | 0.7 $\pm$ 0.3 <sup>bc</sup> | 0.0 $\pm$ 0.0 <sup>d</sup> | 0.0 $\pm$ 0.0              |

Control = this treatment is identical to all other treatments but only ddH<sub>2</sub>O was used; RR = reproduction rate; OSR = overall success rate; <sup>z</sup> Mean  $\pm$  SD; Different small letters on bars represent the significant differences within the treatments calculated using Tukey's HSD test at  $p \leq 0.05$ .

**Table S2. Comparative DH Seed Quantity Produced by Paclitaxel and Colchicine by Seedling Immersion Method**

|            | Paclitaxel Seedling Immersion Method |                          |                        |                       |                      |                      | Colchicine Seedling Immersion Method |                         |                        |                        |                       |                      |
|------------|--------------------------------------|--------------------------|------------------------|-----------------------|----------------------|----------------------|--------------------------------------|-------------------------|------------------------|------------------------|-----------------------|----------------------|
|            | Treatment                            | RR (%)                   | OSR%                   | 1-5 Seed/Ear          | 6-25 Seeds/Ear       | >25 Seeds/Ear        | Treatment                            | RR (%)                  | OSR%                   | 1-5 Seed/Ear           | 6-25 Seeds/Ear        | >25 Seeds/Ear        |
| <b>T1</b>  | PTX 100 µM, 8h                       | 6.3±1.7 <sup>bcd Z</sup> | 3.8±0.2 <sup>bc</sup>  | 6.3±1.3 <sup>ab</sup> | 0.0±0.0 <sup>c</sup> | 0.0±0.0 <sup>b</sup> | Colchicine 0.5mM, 8h                 | 2.1±0.9 <sup>ef</sup>   | 1.5±0.5 <sup>def</sup> | 2.1±0.4 <sup>bcd</sup> | 0.0±0.0 <sup>c</sup>  | 0.0±0.0 <sup>b</sup> |
| <b>T2</b>  | PTX 200 µM, 8h                       | 5.1±1.5 <sup>bcdef</sup> | 2.9±0.6 <sup>bcd</sup> | 5.1±1.9 <sup>bc</sup> | 0.0±0.0 <sup>c</sup> | 0.0±0.0 <sup>b</sup> | Colchicine 1.0mM, 8h                 | 3.0±0.5 <sup>e</sup>    | 2.0±0.5 <sup>cd</sup>  | 2.1±1.1 <sup>bcd</sup> | 0.7±0.3 <sup>bc</sup> | 0.0±0.0 <sup>b</sup> |
| <b>T3</b>  | PTX 400, 8h                          | 7.0±1.5 <sup>b</sup>     | 4.3±1.0 <sup>ab</sup>  | 6.2±1.3 <sup>ab</sup> | 0.8±0.2 <sup>b</sup> | 0.0±0.0 <sup>b</sup> | Colchicine 1.5mM, 8h                 | 3.1±1.9 <sup>de</sup>   | 1.7±0.3 <sup>de</sup>  | 1.6±0.2 <sup>d</sup>   | 0.8±0.3 <sup>bc</sup> | 0.8±0.4 <sup>a</sup> |
| <b>T4</b>  | PTX 800 µM, 8h                       | 4.3±1.0 <sup>def</sup>   | 2.0±1.0 <sup>def</sup> | 3.5±0.5 <sup>cd</sup> | 0.9±0.4 <sup>b</sup> | 0.0±0.0 <sup>b</sup> | Colchicine 2.0mM, 8h                 | 5.9±1.0 <sup>ab</sup>   | 2.5±0.5 <sup>bcd</sup> | 4.0±1.0 <sup>ab</sup>  | 2.0±2.0 <sup>a</sup>  | 0.0±0.0 <sup>b</sup> |
| <b>T5</b>  | PTX 100 µM, 16h                      | 6.7±1.3 <sup>bc</sup>    | 3.8±0.8 <sup>bc</sup>  | 6.0±1.0 <sup>ab</sup> | 0.8±0.2 <sup>b</sup> | 0.0±0.0 <sup>b</sup> | Colchicine 0.5mM, 16h                | 5.6±1.4 <sup>abc</sup>  | 3.4±1.5 <sup>ab</sup>  | 4.0±2.0 <sup>ab</sup>  | 0.8±0.3 <sup>bc</sup> | 0.8±0.2 <sup>a</sup> |
| <b>T6</b>  | PTX 200 µM, 16h                      | 6.5±1.5 <sup>bcd</sup>   | 3.8±0.4 <sup>bc</sup>  | 4.0±1.5 <sup>cd</sup> | 1.6±0.4 <sup>a</sup> | 0.8±0.4 <sup>a</sup> | Colchicine 1.0mM, 16h                | 5.3±1.0 <sup>abcd</sup> | 3.0±1.0 <sup>bc</sup>  | 5.3±1.3 <sup>a</sup>   | 0.0±0.0 <sup>c</sup>  | 0.0±0.0 <sup>b</sup> |
| <b>T7</b>  | PTX 400, 16h                         | 9.3±1.8 <sup>a</sup>     | 5.7±1.0 <sup>a</sup>   | 7.8±1.3 <sup>a</sup>  | 1.6±0.4 <sup>a</sup> | 0.0±0.0 <sup>b</sup> | Colchicine 1.5mM, 16h                | 5.6±1.0 <sup>abc</sup>  | 2.3±0.8 <sup>bcd</sup> | 4.0±2.0 <sup>ab</sup>  | 1.7±0.3 <sup>ab</sup> | 0.0±0.0 <sup>b</sup> |
| <b>T8</b>  | PTX 800 µM, 16h                      | 6.5±1.6 <sup>bc</sup>    | 3.3±0.8 <sup>bcd</sup> | 4.0±1.0 <sup>cd</sup> | 1.6±0.4 <sup>a</sup> | 0.8±0.4 <sup>a</sup> | Colchicine 2.0mM, 16h                | 5.2±1.8 <sup>abcd</sup> | 2.0±0.5 <sup>cd</sup>  | 5.2±1.8 <sup>a</sup>   | 0.0±0.0 <sup>c</sup>  | 0.0±0.0 <sup>b</sup> |
| <b>T9</b>  | PTX 100 µM, 24h                      | 4.6±1.4 <sup>cdef</sup>  | 3.0±1.0 <sup>bcd</sup> | 3.8±0.8 <sup>cd</sup> | 0.0±0.0 <sup>c</sup> | 0.8±0.3 <sup>a</sup> | Colchicine 0.5mM, 24h                | 7.0±2.0 <sup>a</sup>    | 4.4±0.5 <sup>a</sup>   | 4.6±0.9 <sup>a</sup>   | 2.3±0.8 <sup>a</sup>  | 0.0±0.0 <sup>b</sup> |
| <b>T10</b> | PTX 200 µM, 24h                      | 4.0±0.8 <sup>ef</sup>    | 2.4±0.6 <sup>cde</sup> | 4.0±1.0 <sup>cd</sup> | 0.0±0.0 <sup>c</sup> | 0.0±0.0 <sup>b</sup> | Colchicine 1.0mM, 24h                | 3.7±1.0 <sup>cde</sup>  | 2.0±1.0 <sup>cd</sup>  | 3.7±0.9 <sup>abc</sup> | 0.0±0.0 <sup>c</sup>  | 0.0±0.0 <sup>b</sup> |
| <b>T11</b> | PTX 400, 24h                         | 5.2±1.3 <sup>bcd</sup>   | 3.0±2.0 <sup>bcd</sup> | 3.4±0.6 <sup>cd</sup> | 1.0±0.1 <sup>b</sup> | 1.0±0.5 <sup>a</sup> | Colchicine 1.5mM, 24h                | 4.0±1.0 <sup>bcd</sup>  | 1.4±0.5 <sup>def</sup> | 4.0±1.0 <sup>abc</sup> | 0.0±0.0 <sup>c</sup>  | 0.0±0.0 <sup>b</sup> |
| <b>T12</b> | PTX 800 µM, 24h                      | 3.0±1.0 <sup>f</sup>     | 1.6±0.4 <sup>ef</sup>  | 2.3±0.7 <sup>de</sup> | 0.8±0.4 <sup>b</sup> | 0.0±0.0 <sup>b</sup> | Colchicine 2.0mM, 24h                | 2.0±2.0 <sup>ef</sup>   | 0.5±0.5 <sup>f</sup>   | 2.0±1.0 <sup>cd</sup>  | 0.0±0.0 <sup>c</sup>  | 0.0±0.0 <sup>b</sup> |
| <b>T13</b> | Control                              | 0.7±0.3 <sup>g</sup>     | 0.6±0.4 <sup>f</sup>   | 0.7±0.3 <sup>e</sup>  | 0.0±0.0 <sup>c</sup> | 0.0±0.0 <sup>b</sup> | Control                              | 0.7±0.3 <sup>f</sup>    | 0.6±0.4 <sup>ef</sup>  | 0.7±0.3 <sup>d</sup>   | 0.0±0.0 <sup>c</sup>  | 0.0±0.0 <sup>b</sup> |

Control = this treatment is identical to all other treatments but only ddH<sub>2</sub>O was used; RR = reproduction rate; OSR = overall success rate;<sup>Z</sup> Mean ± SD; Different small letters on bars represent the significant differences within the treatments calculated using Tukey's HSD test at  $P \leq 0.05$ .

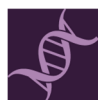

**Table S3. Number of Silks/Ear (V1).**

| REPLICATION | PLANT NO. | PACLITAXEL | COLCHICINE | CONTROL |
|-------------|-----------|------------|------------|---------|
| R1          | P1        | 235        | 190        | 255     |
| R1          | P2        | 240        | 199        | 272     |
| R1          | P3        | 236        | 210        | 260     |
| R1          | P4        | 255        | 208        | 272     |
| R1          | P5        | 240        | 225        | 269     |
| R2          | P6        | 230        | 211        | 278     |
| R2          | P7        | 233        | 200        | 252     |
| R2          | P8        | 223        | 194        | 260     |
| R2          | P9        | 226        | 202        | 278     |
| R2          | P10       | 247        | 217        | 271     |
| R3          | P11       | 243        | 209        | 280     |
| R3          | P12       | 235        | 222        | 263     |
| R3          | P13       | 230        | 220        | 275     |
| R3          | P14       | 230        | 192        | 252     |
| R3          | P15       | 250        | 209        | 262     |
| R4          | P16       | 241        | 219        | 275     |
| R4          | P17       | 220        | 223        | 274     |
| R4          | P18       | 238        | 197        | 278     |
| R4          | P19       | 220        | 220        | 261     |
| R4          | P20       | 229        | 192        | 260     |

**Table S4. Number of Silks/Ear (V2).**

| REPLICATION | PLANT NO. | PACLITAXEL | COLCHICINE | CONTROL |
|-------------|-----------|------------|------------|---------|
| R1          | P1        | 251        | 208        | 263     |
| R1          | P2        | 265        | 220        | 280     |
| R1          | P3        | 270        | 175        | 298     |
| R1          | P4        | 247        | 210        | 267     |
| R1          | P5        | 263        | 225        | 277     |
| R2          | P6        | 266        | 195        | 320     |
| R2          | P7        | 240        | 229        | 318     |
| R2          | P8        | 259        | 210        | 317     |
| R2          | P9        | 247        | 235        | 295     |
| R2          | P10       | 240        | 211        | 305     |
| R3          | P11       | 265        | 222        | 320     |
| R3          | P12       | 267        | 228        | 315     |
| R3          | P13       | 255        | 223        | 289     |
| R3          | P14       | 259        | 227        | 309     |
| R3          | P15       | 249        | 236        | 305     |
| R4          | P16       | 263        | 192        | 289     |
| R4          | P17       | 262        | 199        | 311     |
| R4          | P18       | 270        | 195        | 290     |
| R4          | P19       | 238        | 230        | 319     |
| R4          | P20       | 227        | 232        | 292     |

**Table S5. Plant Weight (V1).**

| REPLICATION | PLANT NO. | PACLITAXEL<br>(gm) | COLCHICINE<br>(gm) | CONTROL<br>(gm) |
|-------------|-----------|--------------------|--------------------|-----------------|
| R1          | P1        | 107.254            | 80.641             | 130.257         |
| R1          | P2        | 105.540            | 82.514             | 129.954         |
| R1          | P3        | 100.920            | 72.980             | 138.500         |
| R1          | P4        | 95.520             | 75.541             | 140.451         |
| R1          | P5        | 97.254             | 84.654             | 137.890         |
| R2          | P6        | 99.652             | 80.325             | 143.540         |
| R2          | P7        | 100.612            | 82.540             | 140.980         |
| R2          | P8        | 105.420            | 63.920             | 147.540         |
| R2          | P9        | 109.525            | 66.528             | 138.000         |
| R2          | P10       | 101.786            | 69.653             | 133.654         |
| R3          | P11       | 108.845            | 81.958             | 140.985         |
| R3          | P12       | 104.654            | 85.560             | 143.571         |
| R3          | P13       | 101.520            | 84.120             | 140.100         |
| R3          | P14       | 108.000            | 83.369             | 131.540         |
| R3          | P15       | 110.110            | 78.800             | 141.240         |
| R4          | P16       | 105.520            | 75.970             | 134.620         |
| R4          | P17       | 107.542            | 76.652             | 137.210         |
| R4          | P18       | 97.980             | 77.980             | 139.328         |
| R4          | P19       | 98.200             | 82.641             | 141.500         |
| R4          | P20       | 97.328             | 81.890             | 142.900         |

**Table S6. Plant Weight (V2).**

| REPLICATION | PLANT NO. | PACLITAXEL<br>(gm) | COLCHICINE<br>(gm) | CONTROL<br>(gm) |
|-------------|-----------|--------------------|--------------------|-----------------|
| R1          | P1        | 123.100            | 105.580            | 140.120         |
| R1          | P2        | 119.256            | 99.870             | 147.322         |
| R1          | P3        | 119.900            | 107.210            | 150.125         |
| R1          | P4        | 118.230            | 103.560            | 155.142         |
| R1          | P5        | 120.541            | 97.520             | 160.245         |
| R2          | P6        | 121.580            | 105.900            | 155.456         |
| R2          | P7        | 116.400            | 102.240            | 151.258         |
| R2          | P8        | 117.528            | 99.230             | 150.140         |
| R2          | P9        | 116.800            | 101.250            | 147.890         |
| R2          | P10       | 119.485            | 100.510            | 150.548         |
| R3          | P11       | 120.250            | 97.650             | 152.254         |
| R3          | P12       | 125.854            | 102.451            | 156.230         |
| R3          | P13       | 123.950            | 103.215            | 158.650         |
| R3          | P14       | 117.300            | 106.542            | 160.210         |
| R3          | P15       | 119.350            | 102.420            | 143.654         |
| R4          | P16       | 117.200            | 105.120            | 147.700         |
| R4          | P17       | 122.850            | 107.621            | 147.982         |
| R4          | P18       | 130.740            | 101.250            | 152.200         |
| R4          | P19       | 124.250            | 100.321            | 145.650         |
| R4          | P20       | 121.300            | 105.510            | 144.255         |

**Table S7.** Genetic Materials and Experimental Locations.

| Experiment #                                   | Geno type Code | Germplasm Nature       | Combination/Cross                                                       | Inducer Nature         | Induction (season & year) | Experiment Locations                      | Year & Season of Study |
|------------------------------------------------|----------------|------------------------|-------------------------------------------------------------------------|------------------------|---------------------------|-------------------------------------------|------------------------|
| Experiment 1<br>(PTX Field Experiment)         |                |                        |                                                                         |                        |                           | Agriculture Research Station, Liuhe, JAAS | Spring-2022            |
| Experiment 2<br>(CAF-T Field Experiment)       | -              | Tropical               | ((GO927 × 986) × Stock 6 Inducer)                                       | Temperate              | Spring-2020               |                                           |                        |
| Experiment 3<br>(Colchicine Field Experiment)  |                |                        |                                                                         |                        |                           |                                           |                        |
| Experiment 4* & 5*                             | V1<br>V2       | Temperate<br>Temperate | ((G3 × DH1667) × Stock 6 Inducer)<br>((PH6WC × O849) × Stock 6 Inducer) | Temperate<br>Temperate | Autumn-2019               | Teaching and Research Centre, Baima, NJAU | Autumn-2022            |
| Experiment 6* & 7*<br>(Microscopic Validation) | -              | Temperate              | ((((PH6WC × SD375) × SD375) × SD375) × Stock 6 Inducer))                | Temperate              | Spring-2020               | NJAU                                      | Autumn-2022            |

\*Experiment 4 = Large scale studies; \*Experiment 5 = Morphological and physiological studies; \*Experiment 6 = PTX microscopic validation;

\*Experiment 7 = CAF-T microscopic validation; JAAS = Jiangsu Academy of Agricultural Sciences; NJAU = Nanjing Agricultural University
